# Supplementary material for: Cellulose nanocrystal-reinforced thermally responsive dynamic hydrogel
Source: Royal Society of Chemistry journal article supplement (doi:10.1039/d4nj02971b), 2024-01-01
Supplement: d4nj02971b1.pdf [file d4nj02971b1.pdf]

## Cellulose nanocrystal reinforced thermal responsive dynamic hydrogel

Long Yang,<sup>\*a, b</sup> Simei Zhang,<sup>a, b</sup> Zemei Hu,<sup>a, b</sup> Jing Li,<sup>a, b</sup> Guangyin Xie<sup>a, b</sup>

<sup>1</sup>School of Textile Science and Engineering, Xi'an Polytechnic University, Xi'an, Shaanxi 710048, China.

<sup>2</sup>Key Laboratory of Functional Textile Material and Product, Xi'an Polytechnic University, Ministry of Education, Xi'an, Shaanxi 710048, China.

E-mail: yanglong@xpu.edu.cn

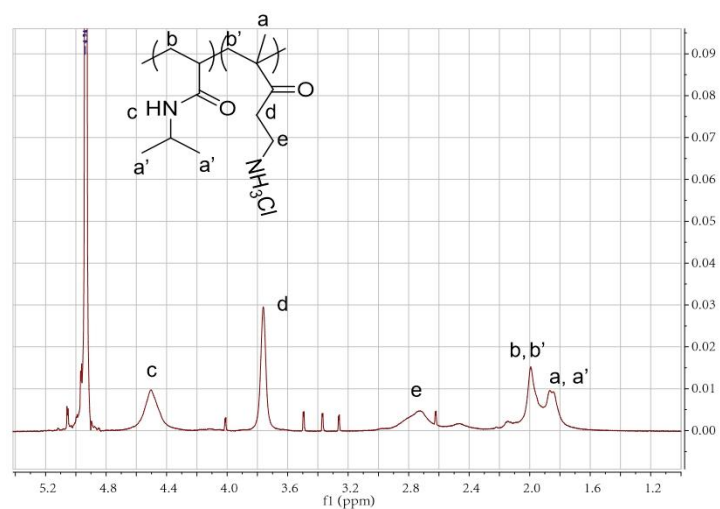

**Fig. S1**  $^1\text{H}$  NMR of PNIPAM-co-PAMAH copolymer

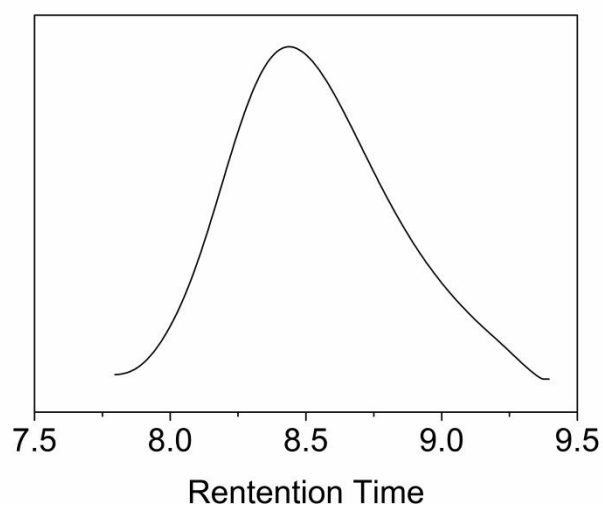

**Fig. S2** SEC curve of PNIPAM-co-PAMAH copolymer

**Table S1.** Molecule weight of PNIPAM-co-PAMAH copolymer

| Sample          | $M_n$ | $M_w$ | $D=M_w/M_n$ |
|-----------------|-------|-------|-------------|
| PNIPAM-co-PAMAH | 6153  | 8692  | 1.41        |

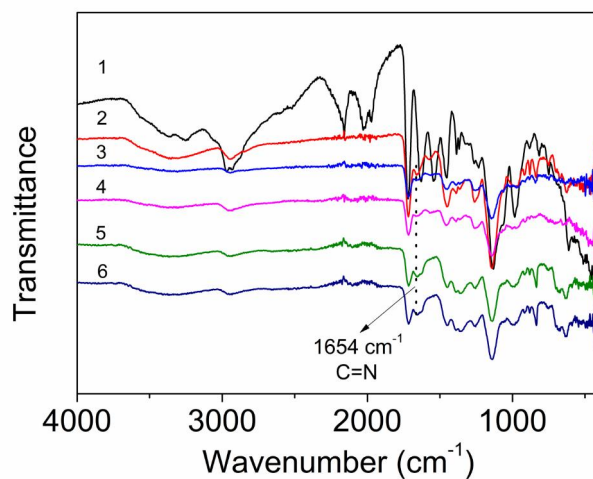

**Fig. S3** FT-IR of PNIPAM-co-PAMAH (1), HG (2), HG-1.0wt% CNCs (3), HG-5.0wt% CNCs (4), HG-10.0wt% CNCs (5) and HG-100wt% CNCs (6)

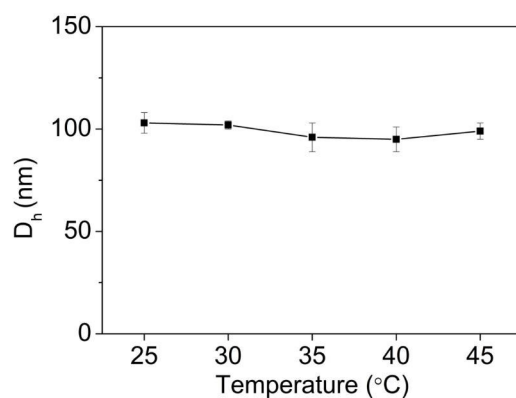

**Fig. S4** Hydrodynamic diameter of CNCs (1.0 mg/mL) at different temperature

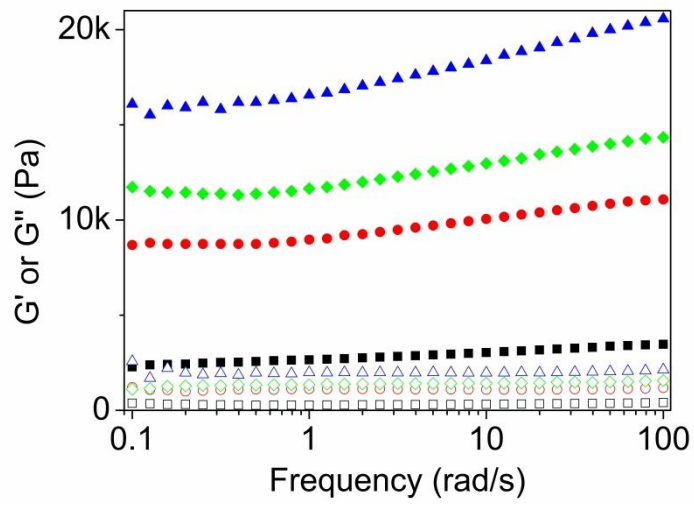

**Fig. S5 A)** Dynamic frequency sweeps for HG (black), HG-1.0wt% CNCs (red), HG-5.0wt% CNCs (green) and HG-10.0wt% CNCs (blue). The storage modulus,  $G'$ , and loss modulus,  $G''$ , are shown in close and open symbols, respectively.

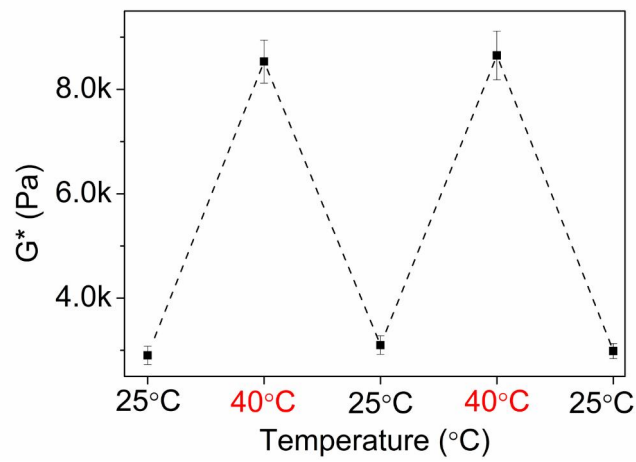

**Fig. S6** Complex modulus of hydrogel at 25  $^{\circ}\text{C}$  and 40  $^{\circ}\text{C}$  from cycling experiment.

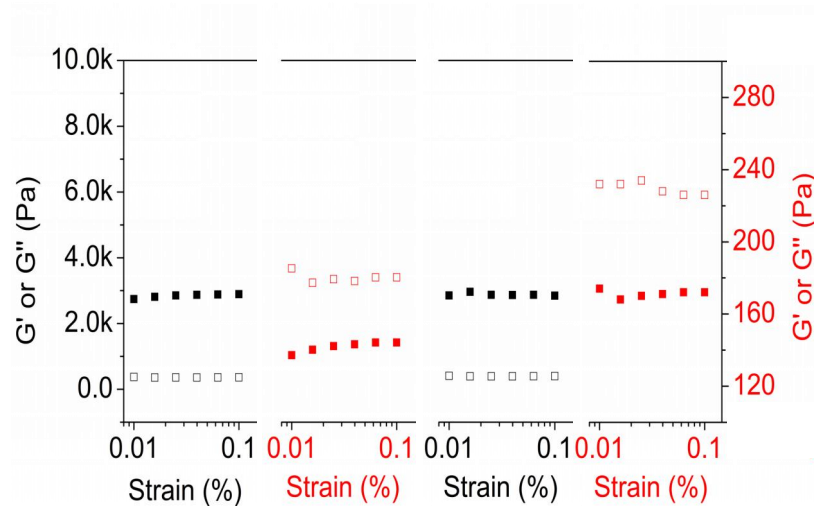

**Fig. S7** Dynamic strain sweeps of HG at pH 7.0 (black) and 4.0 (red).

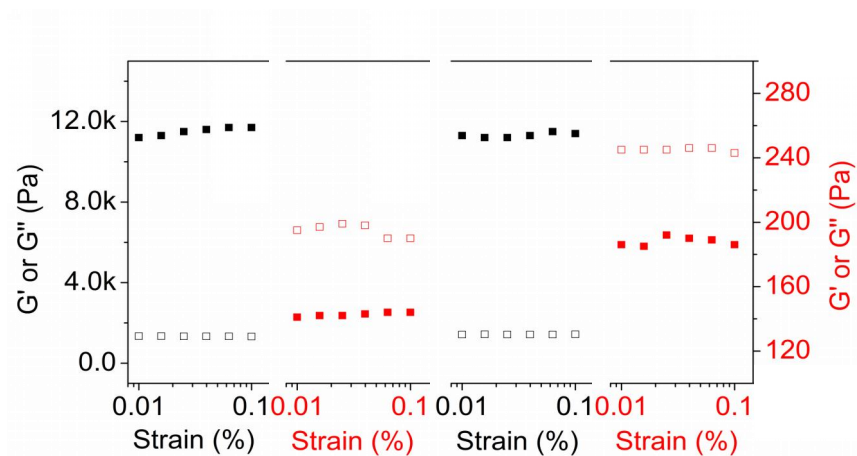

**Fig. S8** Dynamic strain sweeps of HG with 1.0 wt% CNCs at pH 7.0 (black) and 4.0 (red).

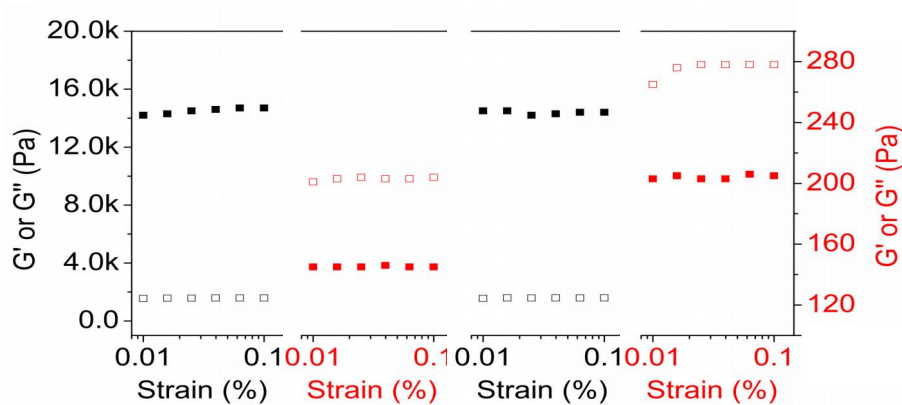

**Fig. S9** Dynamic strain sweeps of HG with 5.0 wt% CNCs at pH 7.0 (black) and 4.0 (red).
